# Supplementary material for: Sphingosine kinases negatively regulate the expression of matrix metalloproteases (MMP1 and MMP3) and their inhibitor TIMP3 genes via sphingosine 1‐phosphate in extravillous trophoblasts
Source: PubMed Central journal article supplement (PMC8254167; doi:10.1002/rmb2.12379), 2021-03-22
Supplement: RMB2-20-267-s003.pdf [file RMB2-20-267-s003.pdf]

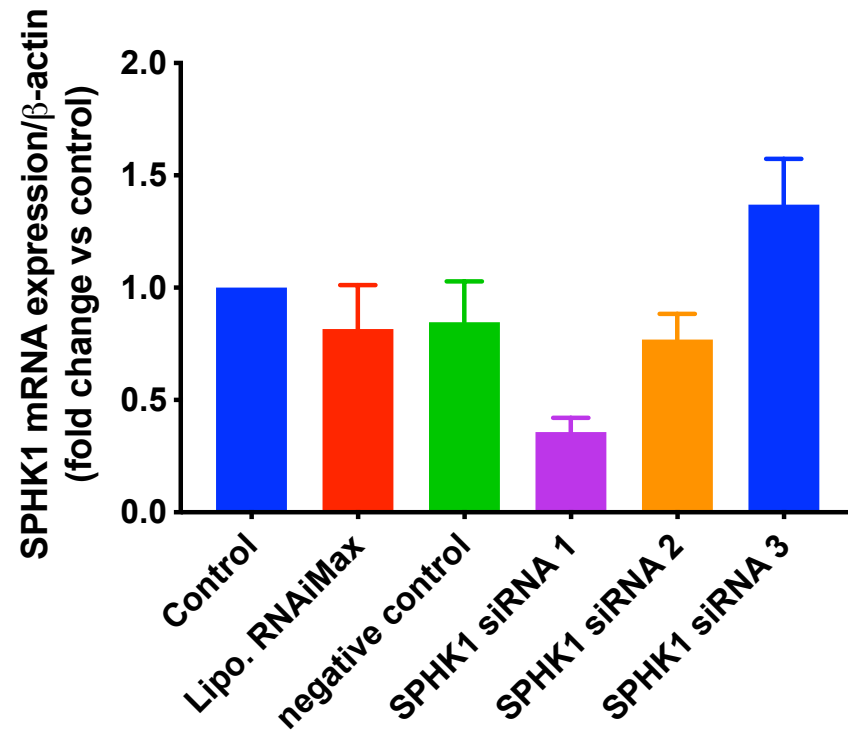

B

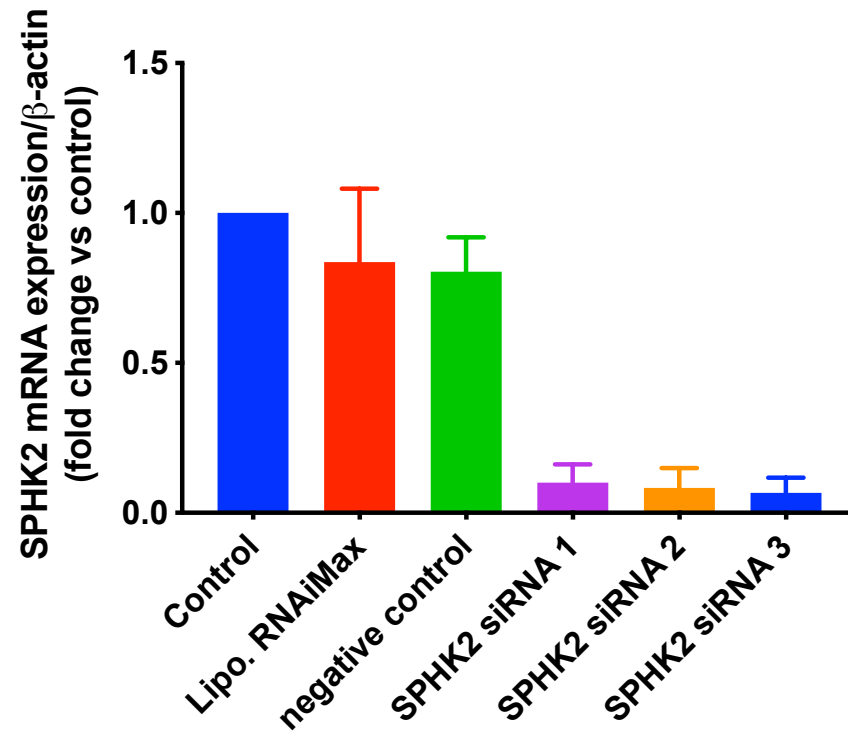

**Figure S1:** Knockdown efficiency of *SPHK1* and *SPHK2* specific siRNAs.

Cells were transfected with *SPHK1* or *SPHK2* specific siRNA as described in materials and methods. The expression of A) *SPHK1* and B) *SPHK2* genes were measured by real-time PCR. Scrambled siRNA was used as negative control
